# Supplementary material
Source: MDPI journal article supplement (https://www.mdpi.com/2073-4441/9/8/617)
Supplement: s1 [file s1]

## Supplementary Materials

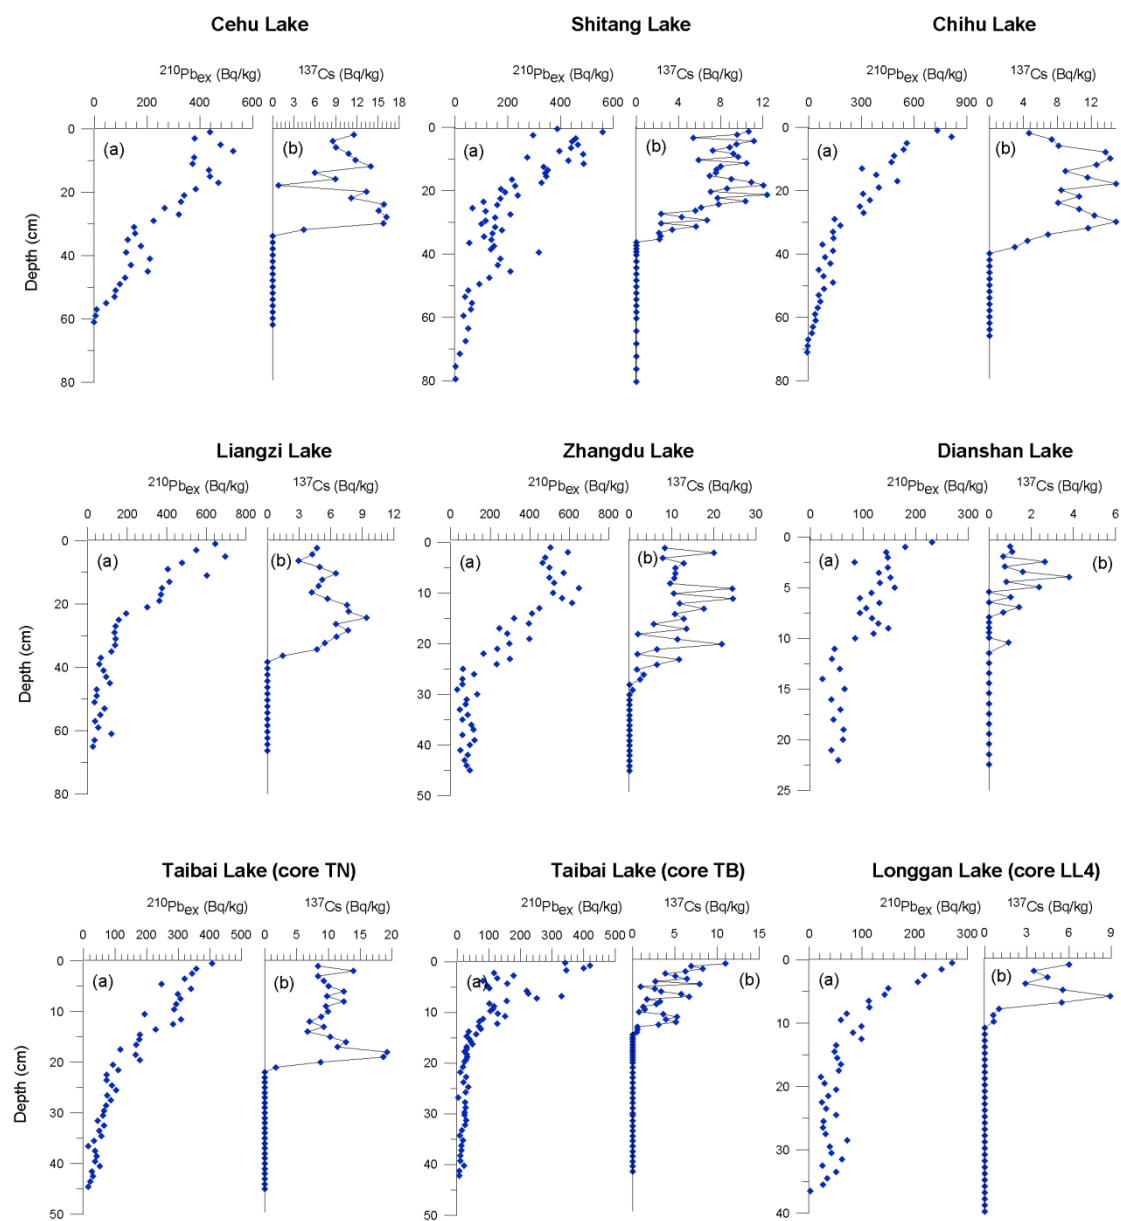

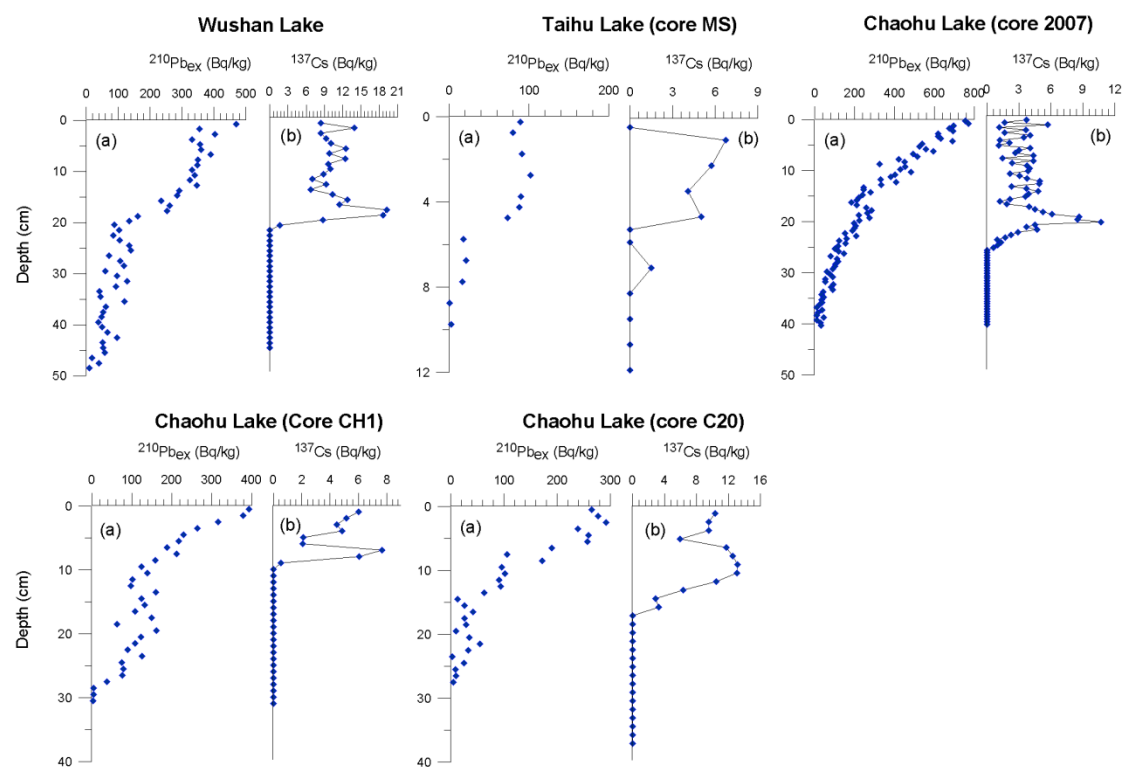

**Figure S1.** Unsupported  $^{210}\text{Pb}$  (CRS model) activity and  $^{137}\text{Cs}$  activity for 15 cores in 11 lakes.
